# Supplementary material for: Controlled growth of a bicomponent supramolecular network by the sergeants & soldiers principle
Source: Royal Society of Chemistry journal article supplement (doi:10.1039/c8cc04226h), 2018-01-01
Supplement: c8cc04226h1.pdf [file c8cc04226h1.pdf]

## Electronic Supplementary Information

### Under-Controlled Growth of a Bicomponent Supramolecular Network by Sergeants&Soldiers Principle

G. Zhan, Y. Makoudi, M. Feron, J. Jeannoutot, F. Palmino and F. Chérioux\*

Institut FEMTO-ST, Univ. Bourgogne Franche-Comté, CNRS, 15B Avenue  
des Montboucons, F-25030 Besancon, FRANCE

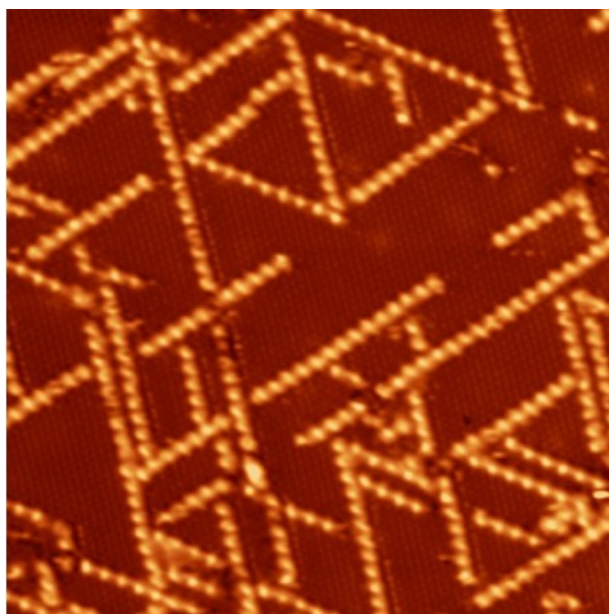

**Fig. S1** STM image of NN lines on Si(111)-B ( $60 \times 60 \text{ nm}^2$ ,  $I_t = 10 \text{ pA}$ ,  $V_s = -2.8 \text{ V}$ ,  $T = 110 \text{ K}$ ).
